# Supplementary material
Source: PubMed Central journal article supplement (PMC6425731)
Supplement: NIHMS997154-supplement-Supp__Info_.pdf [file NIHMS997154-supplement-Supp__Info_.pdf]

# Supporting Information

## **Oxidation of 8-oxo-7,8-dihydro-2'-deoxyguanosine leads to substantial DNA-histone cross-links within nucleosome core particles**

Jing Bai,<sup>1</sup> Yingqian Zhang,<sup>1</sup> Zhen Xi,<sup>1</sup> Marc M. Greenberg<sup>3</sup> and Chuanzheng Zhou<sup>1,2,\*</sup>

<sup>1</sup> State Key Laboratory of Elemento-Organic Chemistry and Department of Chemical Biology, College of Chemistry, Nankai University, Tianjin 300071, China

<sup>2</sup> Collaborative Innovation Center of Chemical Science and Engineering (Tianjin), Tianjin 300071, China

<sup>3</sup> Department of Chemistry, Johns Hopkins University, 3400 N. Charles St., Baltimore, MD 21218, USA

\* Corresponding author: Chuanzheng Zhou. Email: [chuanzheng.zhou@nankai.edu.cn](mailto:chuanzheng.zhou@nankai.edu.cn)

## Contents:

**Figure S1.** Preparation of 145 nt singl-stranded 601 DNA by ligation. (S3)

**Figure S2.** 5% nondenaturing PAGE analysis of the formation and stability of NCPs. (S4)

**Figure S3.** 10% SDS PAGE analysis of histone octamers treated with different concentrations of  $\text{Na}_2\text{IrCl}_6$ ,  $\text{Na}_2\text{IrBr}_6$  and  $\text{K}_3\text{Fe}(\text{CN})_6$ . (S5)

**Figure S4.** Representative gels of DPC formation and DNA scission in NCPs containing wide type histones. (S8)

**Figure S5.** Kinetics of 8-oxodGuo oxidation and DPC formation in NCPs containing wide type histones. (S9)

**Figure S6.** Protein identification though MS/MS analysis of tryptic peptide fragments of DPC generated from NCP-8-oxodGuo<sup>89</sup>/C. (S11)

**Figure S7.** Kinetics of 8-oxodGuo oxidation and DPC formation in NCP-8-oxodGuo<sup>89</sup>/C containing mutated histone H4. (S12)

**Figure S8.** Representative gels of DPC formation and DNA scission in NCP-8-oxodGuo<sup>89</sup>/C containing mutated histone H4. (S15)

**Figure S9.** Representative gels of DPC formation in NCP-8-oxodGuo<sup>89</sup>/T in the presence of 1 mM spermine. (S16)

(f601-F1) (FAM)-ATCGATGTATATATCTGACACGTGCCTGGA (30 nt)  
 (p601-F2) pGACTAGGGAGTAATCCCCCTTGGCGGTTAAAACGCG (35 nt)  
 (p601-F3) pGGGGACAGCGCGTACGTGCGTTTGAGCGGTGCTAG (35 nt)  
 (p601-F3<sup>89</sup>) pGGGGACAGCGCGTACGTGCGTTT X<sup>89</sup>AGCGGTGCTAG (35 nt)  
 (p601-F3<sup>73</sup>) pGGGGACAX<sup>73</sup>CGCGTACGTGCGTTTGAGCGGTGCTAG (35 nt)  
 (p601-F4) pAGCTGTCTACGACCAATTGAGCGGCCTCGGCACCGGGATTCTGAT (45 nt)  
 (p601-F4<sup>137</sup>) pAGCTGTCTACGACCAATTGAGCGGCCTCGGCACCGGX<sup>137</sup>ATTCTGAT (45 nt)  
 (601-T1) CTCCCTAGTCTCCAGGCACG (20 nt)  
 (601-T2) CGCTGTCCCCCGCGTTTTAA (20 nt)  
 (601-T3) GTAGACAGCTCTAGCACCGC (20 nt)

(Zhou-R1) ATCAGAATCCCGGTGCCGAGGCCGCTCAATTGGTC (35 nt)  
 (pZhou-R2) pGTAGACAGCTCTAGCACCGCTCAAACGCAC (30 nt)  
 (pZhou-R3) pGTACGCGCTGTCCCCCGCGTTTTAACCGCCAAGGG (35 nt)  
 (pZhou-R4) pGATTACTCCCTAGTCTCCAGGCACGTGTCAGATATATACATCGAT (45 nt)  
 (601-T4) AGCTGTCTACGACCAATTGA (20 nt)  
 (601-T5) CAGCGGTACGTGCGTTTGA (20 nt)  
 (601-T6) GGGAGTAATCCCCCTTGGCGG (20 nt)  
 (601-T7) CGCTGAAACGCACGTACG CG (20 nt)

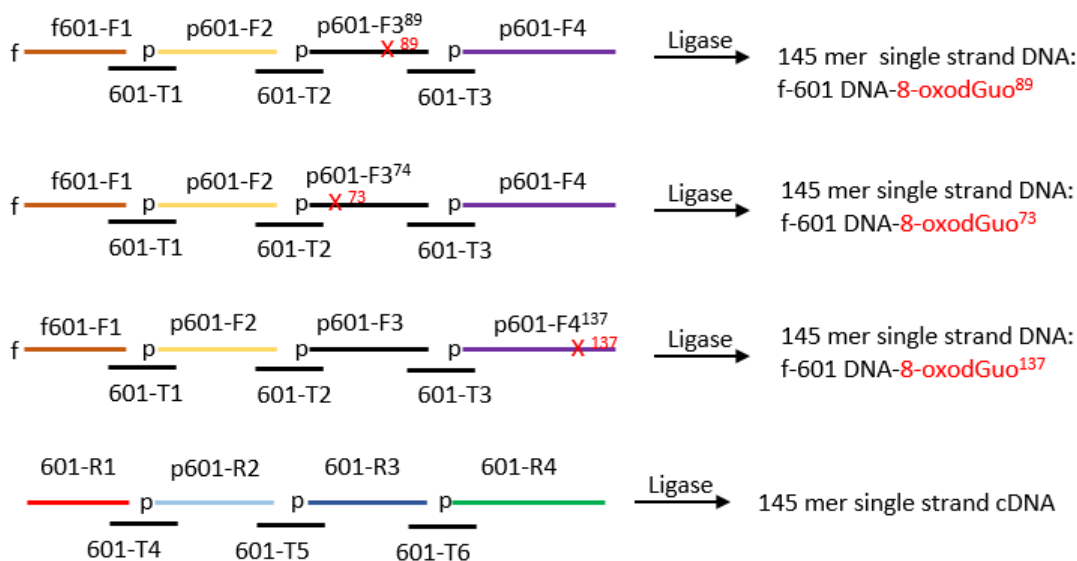

**Sequence of 145 nt single-stranded 601 DNA:**

5' (FAM) ATCGATGTATATATCTGACACGTGCCTGGAGACTAGGGAGTAATCCCCCTTGGCGGTTAAAACGCGGGGGACAG<sup>73</sup>GGCGTACG  
 TGCGTTTG<sup>89</sup>AGCGGTGCTAGAGCTGTCTACGACCAATTGAGCGGCCTCGGCACCGGG<sup>137</sup>ATTCTGAT 3'

**Sequence of 145 nt single-stranded 601 cDNA:**

3' AGCTACATATATAGACTGTGCACGGACCTCTGATCCCTCATTAGGGGAACCGCCAATTTGCGCCCCCTGTGCGCATGCACGCAAAC  
 TCGCCACGATCTCGACAGATGCTGGTTAACTCGCCGGAGCCGTGGCCCTAAGACTA 5' (cDNA)

**Figure S1.** Preparation of 145 nt single-stranded 601 DNA by ligation. “X” denotes 8-oxodGuo. “f” denote 5’-FAM labeling. “p” denotes 5’-phosphate group.

(S2A) Electrophoretic mobility shift assay showing the efficiency of NCP reconstitutions

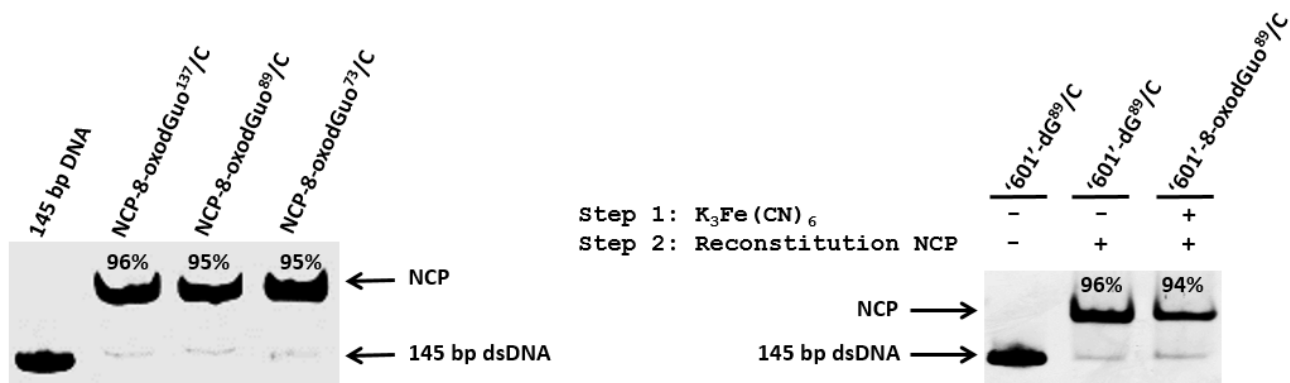

(S2B) Electrophoretic mobility shift assay showing the stability of NCP upon 10 mM  $K_3Fe(CN)_6$  treatment

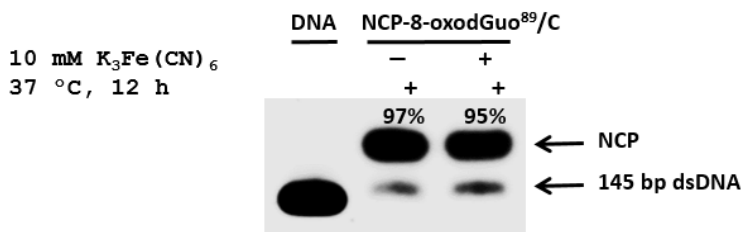

(S2C) Electrophoretic mobility shift assay showing the stability of NCP upon heat treatment

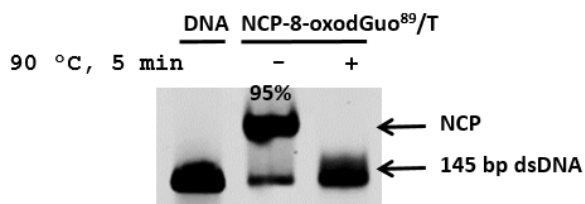

**Figure S2.** 5% (w/v) nondenaturing PAGE analysis of the formation and stability of NCPs.

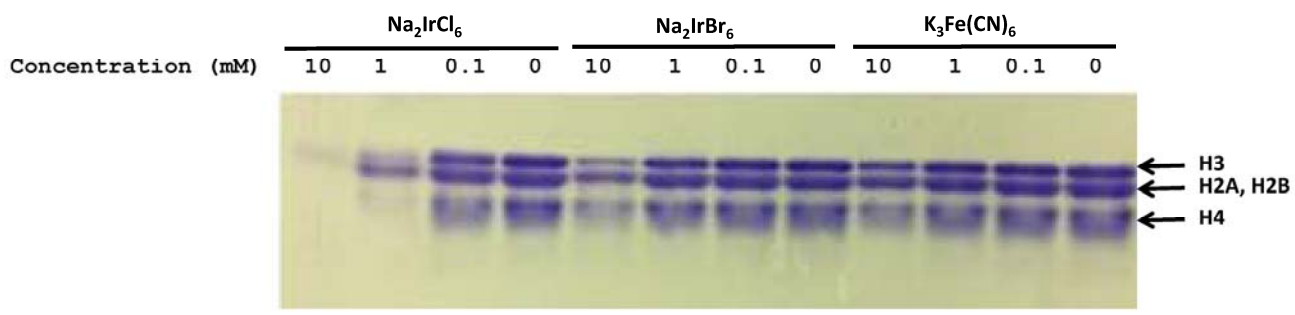

**Figure S3.** 10% (w/v) SDS PAGE analysis of histone octamers treated with different concentrations of  $\text{Na}_2\text{IrCl}_6$ ,  $\text{Na}_2\text{IrBr}_6$  and  $\text{K}_3\text{Fe}(\text{CN})_6$ .

(S4A) 8% (w/v) denaturing PAGE analysis of reactions of NCP-8-oxodGuo<sup>89</sup>/C and free DNA '601'-8-oxodGuo<sup>89</sup>/C upon K<sub>3</sub>Fe(CN)<sub>6</sub> oxidation

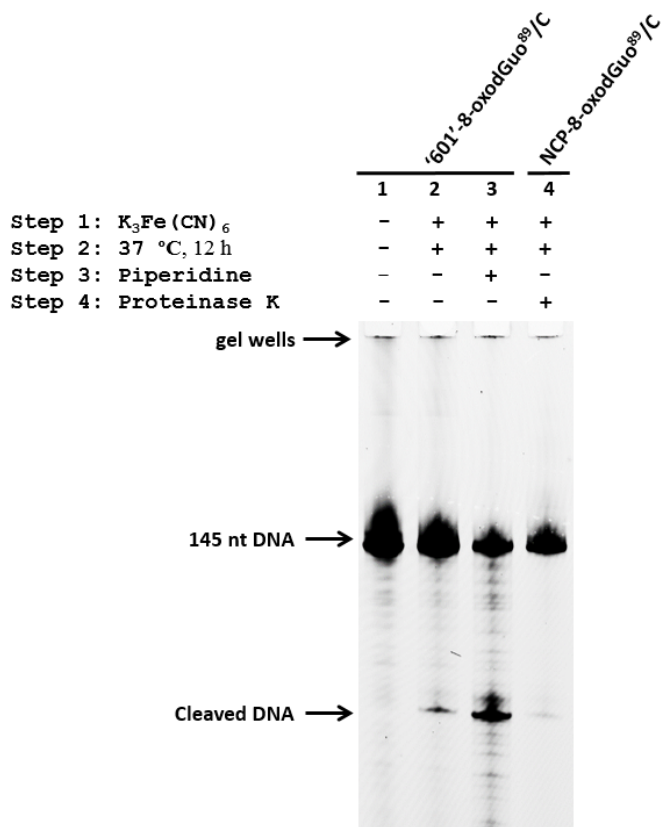

(S4B) 8% (w/v) denaturing PAGE analysis of DNA scission in NCP-8-oxodGuo<sup>89</sup>/C upon K<sub>3</sub>Fe(CN)<sub>6</sub> oxidation

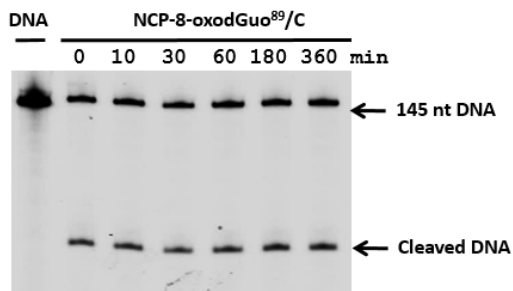

(S4C) 10% (w/v) SDS PAGE analysis of DPC formation in NCP-8-oxodGuo<sup>89</sup>/A upon K<sub>3</sub>Fe(CN)<sub>6</sub> oxidation

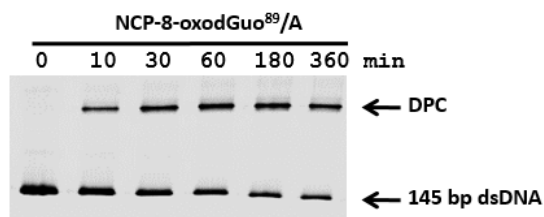

(S4D) 8% (w/v) denaturing PAGE analysis of DNA scission in NCP-8-oxodGuo<sup>89</sup>/A upon K<sub>3</sub>Fe(CN)<sub>6</sub> oxidation

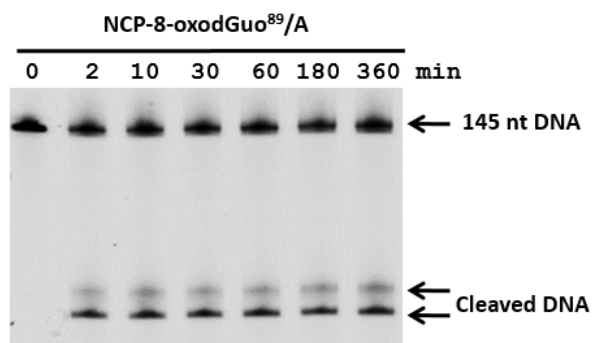

(S4E) 10% (w/v) SDS PAGE analysis of DPC formation in NCP-8-oxodGuo<sup>89</sup>/T upon K<sub>3</sub>Fe(CN)<sub>6</sub> oxidation

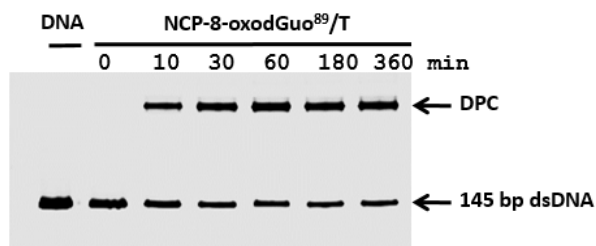

(S4F) 8% (w/v) denaturing PAGE analysis of DNA scission in NCP-8-oxodGuo<sup>89</sup>/T upon K<sub>3</sub>Fe(CN)<sub>6</sub> oxidation

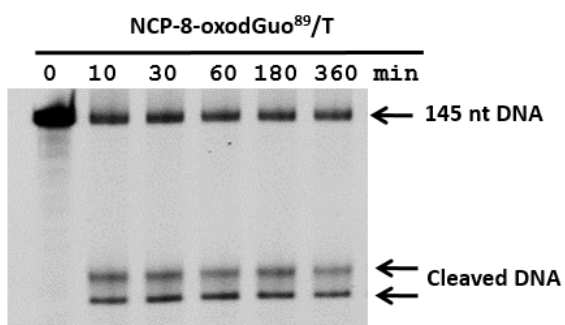

(S4G) 10% (w/v) SDS PAGE analysis of DPC formation in NCP-8-oxodGuo<sup>73</sup>/C upon K<sub>3</sub>Fe(CN)<sub>6</sub> oxidation

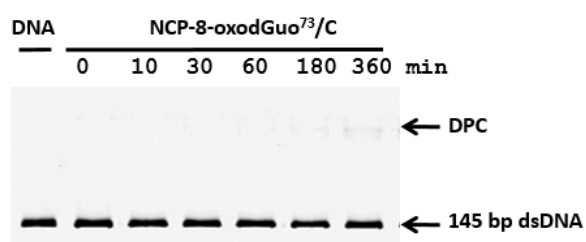

(S4H) 8% (w/v) denaturing PAGE analysis of DNA scission in NCP-8-oxodGuo<sup>73</sup>/C upon K<sub>3</sub>Fe(CN)<sub>6</sub> oxidation

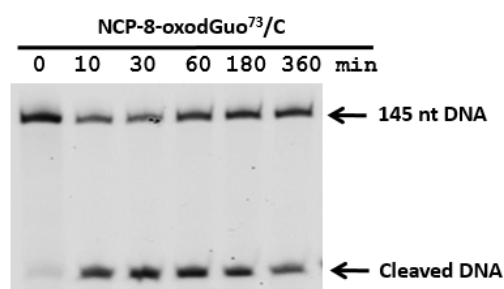

(S4I) 10% (w/v) SDS PAGE analysis of DPC formation in NCP-8-oxodGuo<sup>137</sup>/C upon K<sub>3</sub>Fe(CN)<sub>6</sub> oxidation

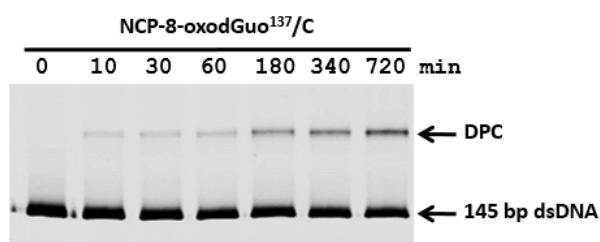

(S4J) 8% (w/v) denaturing PAGE analysis of DNA scission in NCP-8-oxodGuo<sup>137</sup>/C upon K<sub>3</sub>Fe(CN)<sub>6</sub> oxidation

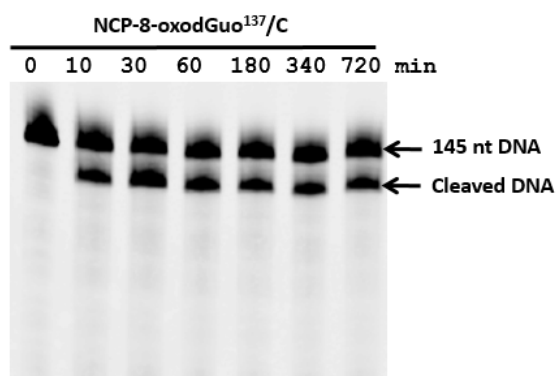

**Figure S4.** Representative gels of DPC formation and DNA scission in NCPs containing wide type histones.



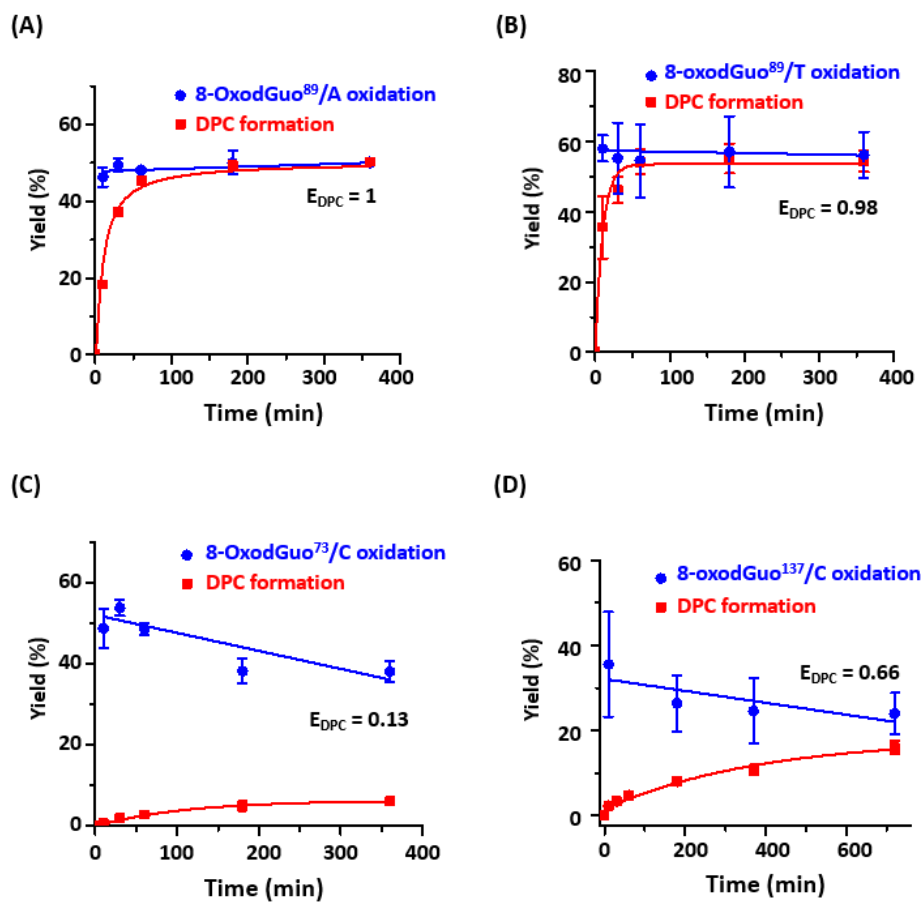

**Figure S5.** Kinetics of 8-oxodGuo oxidation and DPC formation in NCPs containing wide type histones. (A) NCP-8-oxodGuo<sup>89</sup>/A; (B) NCP-8-oxodGuo<sup>89</sup>/T; (C) NCP-8-oxodGuo<sup>73</sup>/C; (D) NCP-8-oxodGuo<sup>137</sup>/C.

(S6A) Identified fragment ISGLIYEETR of H4

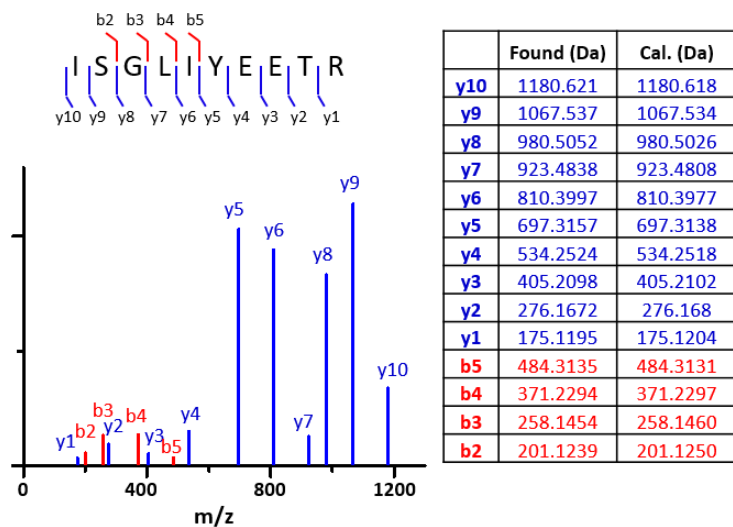

(S6B) Identified fragment TLYGFGG of H4

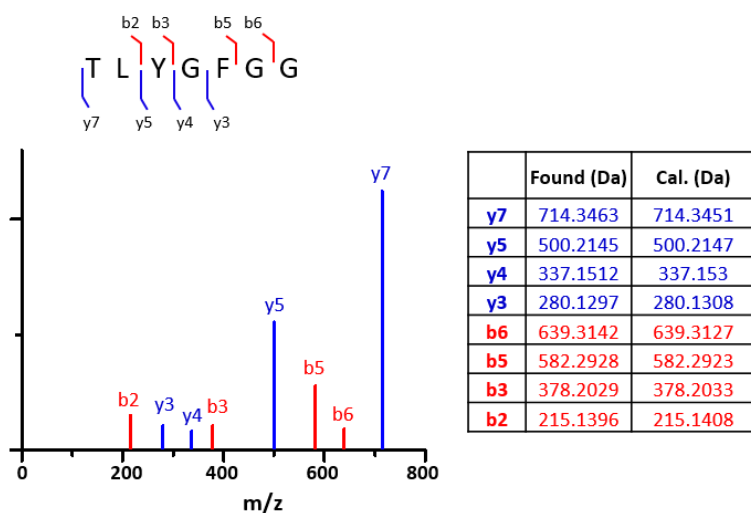

(S6C) Identified fragment VFLENVIR of H4

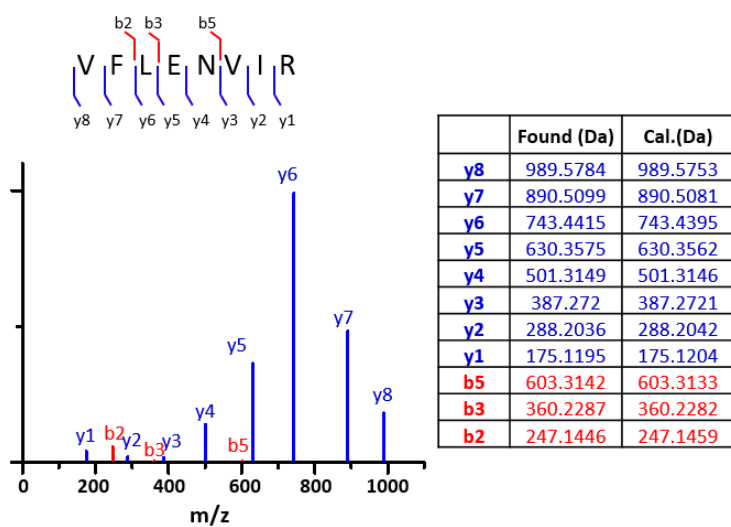

**Figure S6** Protein identification through MS/MS analysis of tryptic peptide fragments of DPC generated from NCP-8-oxodGuo<sup>89</sup>/C.

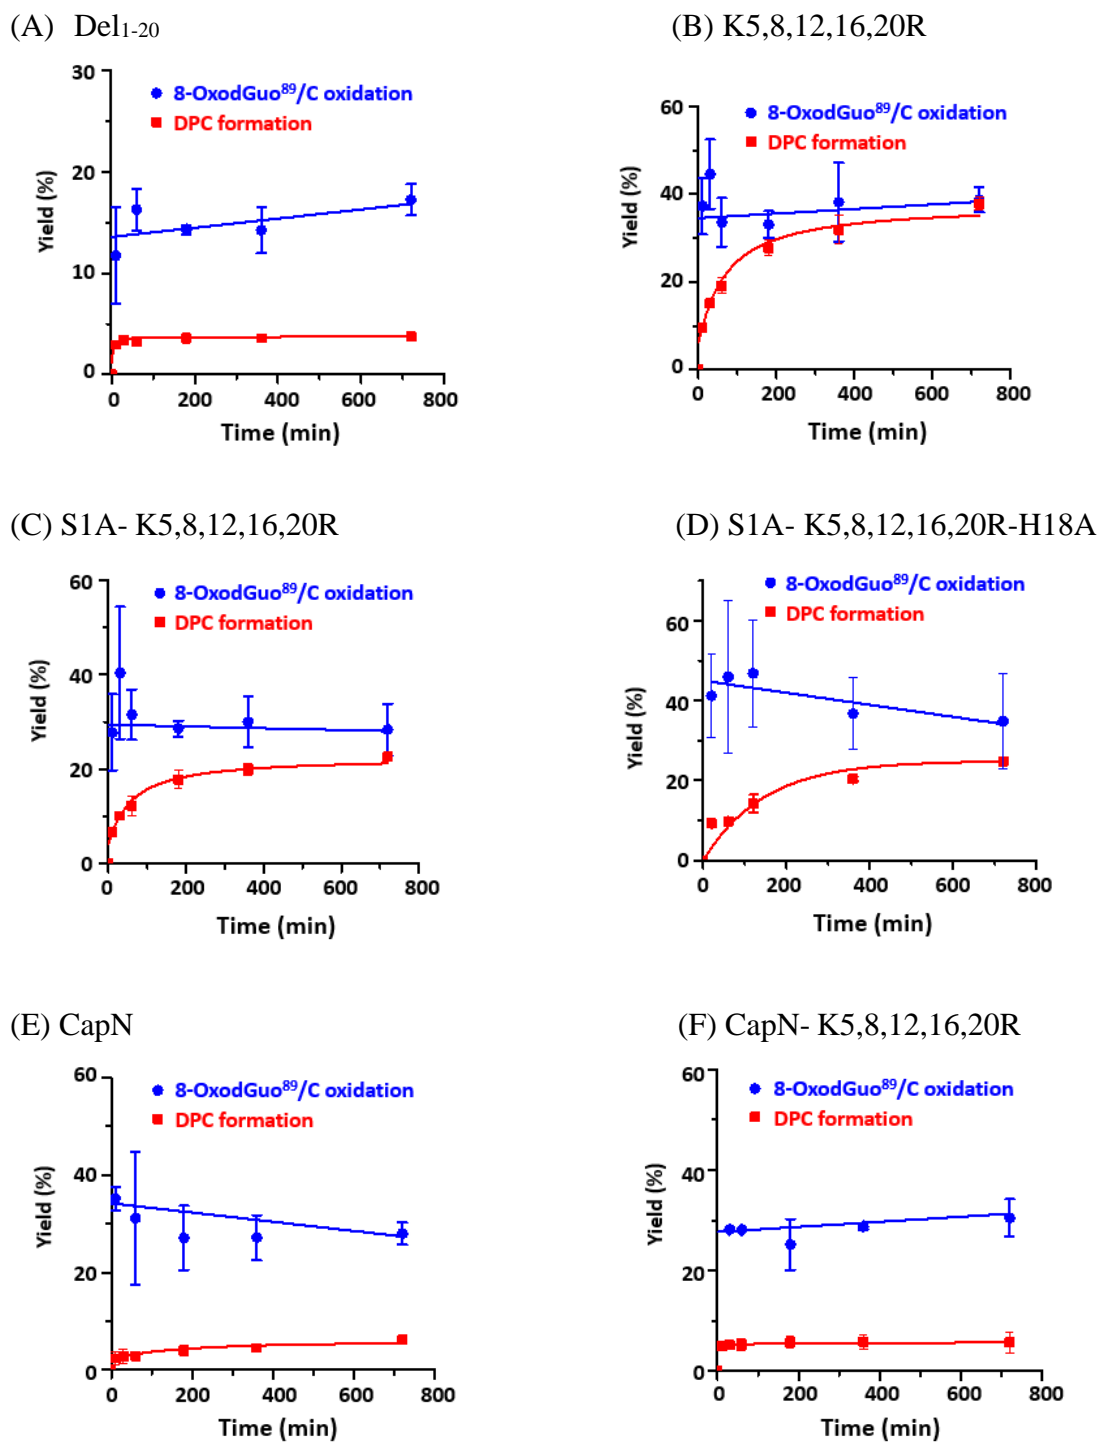

**Figure S7.** Kinetics of 8-oxodGuo oxidation and DPC formation in NCP-8-oxodGuo<sup>89</sup>/C containing mutated histone H4.

(S8A) 10% (w/v) SDS PAGE analysis of DPC formation in NCP-8-oxodGuo<sup>89</sup>/C containing H4-Del<sub>1-20</sub> mutant

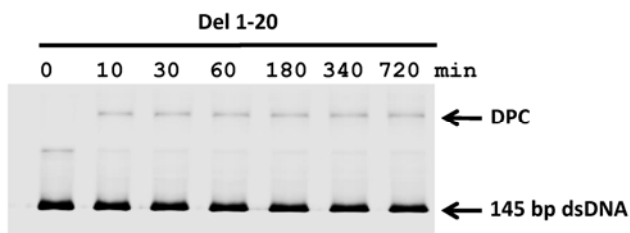

(S8B) 8% (w/v) denaturing PAGE analysis of DNA scission in NCP-8-oxodGuo<sup>89</sup>/C containing H4-Del<sub>1-20</sub> mutant

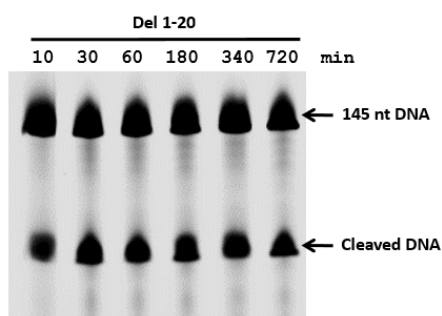

(S8C) 10% (w/v) SDS PAGE analysis of DPC formation in NCP-8-oxodGuo<sup>89</sup>/C containing H4-K5,8,12,16,20R mutant

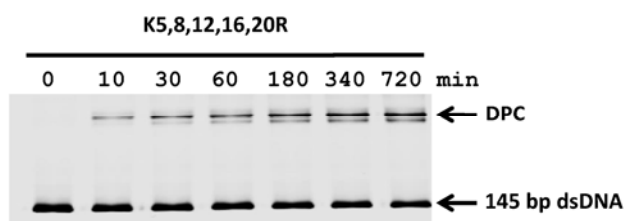

(S8D) 8% (w/v) denaturing PAGE analysis of DNA scission in NCP-8-oxodGuo<sup>89</sup>/C containing H4-K5,8,12,16,20R mutant

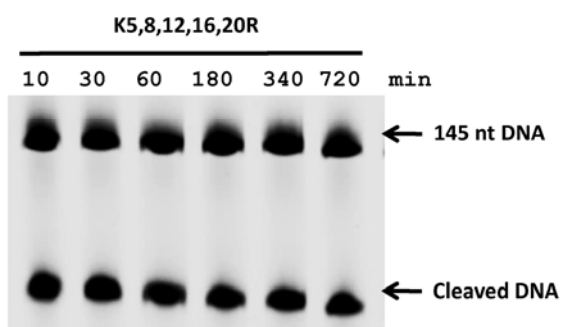

(S8E) 10% (w/v) SDS PAGE analysis of DPC formation in NCP-8-oxodGuo<sup>89</sup>/C containing H4-S1A-K5,8,12,16,20R mutant

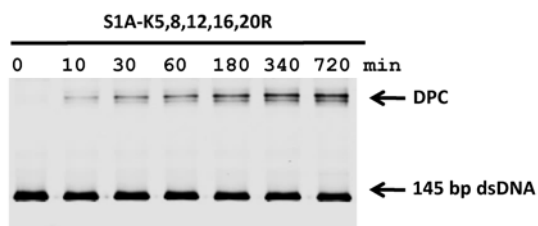

(S8F) 8% (w/v) denaturing PAGE analysis of DNA scission in NCP-8-oxodGuo<sup>89</sup>/C containing H4-S1A-K5,8,12,16,20R mutant

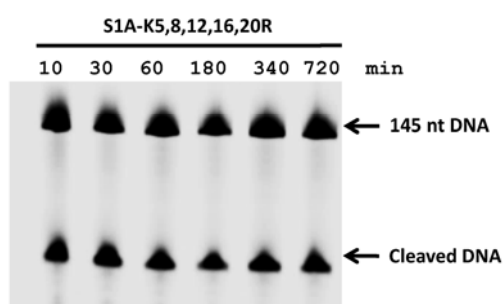

(S8G) 10% (w/v) SDS PAGE analysis of DPC formation in NCP-8-oxodGuo<sup>89</sup>/C containing H4-S1A-K5,8,12,16,20R-H18A mutant

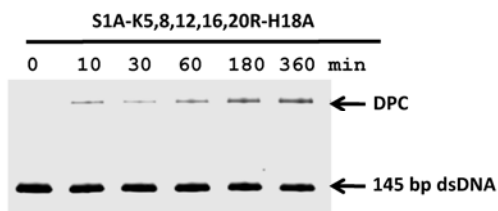

(S8H) 8% (w/v) denaturing PAGE analysis of DNA scission in NCP-8-oxodGuo<sup>89</sup>/C containing H4-S1A-K5,8,12,16,20R-H18A mutant

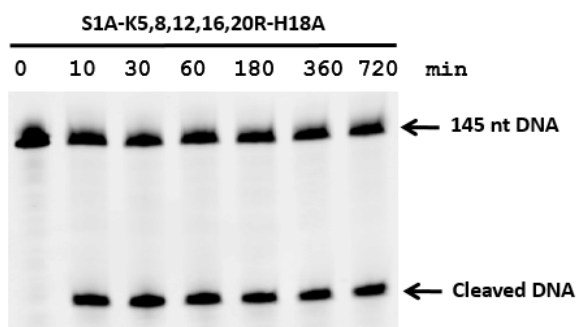

(S8I) 10% (w/v) SDS PAGE analysis of DPC formation in NCP-8-oxodGuo<sup>89</sup>/C containing H4-CapN mutant

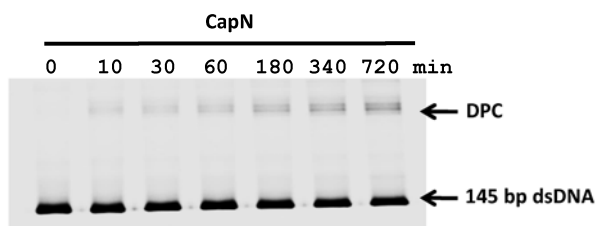

(S8J) 8% (w/v) denaturing PAGE analysis of DNA scission in NCP-8-oxodGuo<sup>89</sup>/C containing H4-CapN mutant

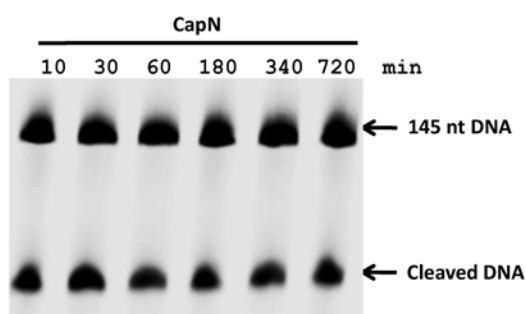

(S8K) 10% (w/v) SDS PAGE analysis of DPC formation in NCP-8-oxodGuo<sup>89</sup>/C containing H4-CapN- K5,8,12,16,20R mutant

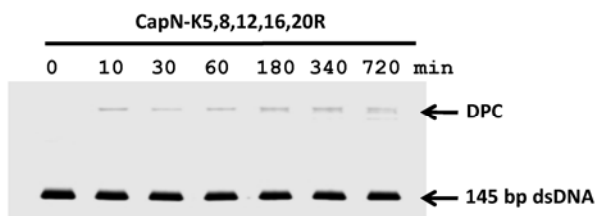

(S8L) 8% (w/v) denaturing PAGE analysis of DNA scission in NCP-8-oxodGuo<sup>89</sup>/C containing H4-CapN- K5,8,12,16,20R mutant

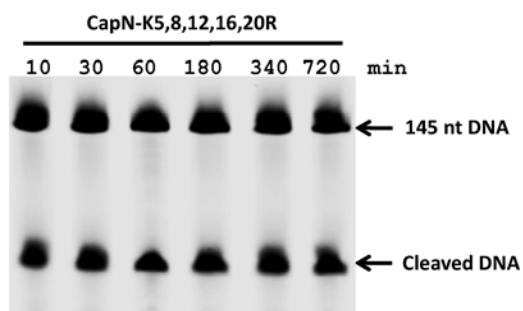

**Figure S8.** Representative gels of DPC formation and DNA scission in NCP-8-oxodGuo<sup>89</sup>/C containing mutated histone H4.

(A) 5% (w/v) nondenaturing PAGE analysis of the stability of NCP upon spermine treatment

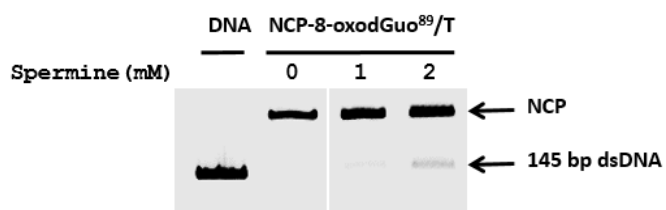

(B) 10% (w/v) SDS PAGE analysis of DPC formation in the presence of spermine

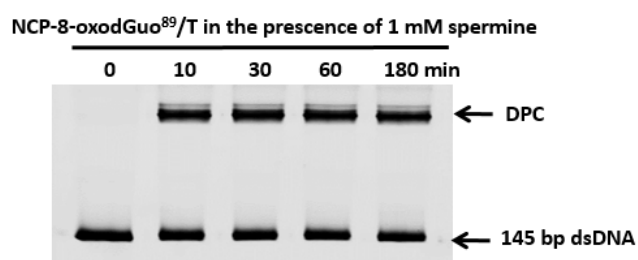

**Figure S9.** Representative gels of DPC formation in NCP-8-oxodGuo<sup>89</sup>/T in the presence of 1 mM spermine.
